# Supplementary material
Source: Springer Nature journal article supplement (https://www.springermedizin.de/resource/supplementary/12981_2009_118_MOESM4_ESM.pdf/9603862)

**AUC for kaolin intake**

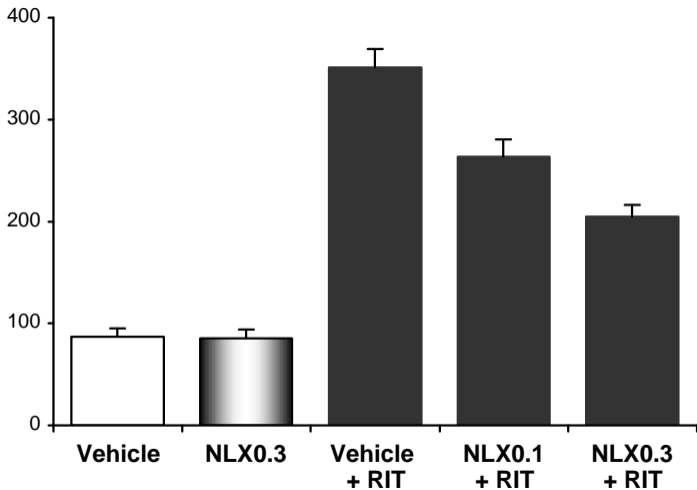

Supplement: MOESM4 [file 9603862]
